# Supplementary material
Source: PubMed Central journal article supplement (PMC4028703)
Supplement: NIHMS584903-supplement-Supporting_Information.pdf [file NIHMS584903-supplement-Supporting_Information.pdf]

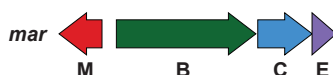

| N  | Gene   | Size (aa) | Homolog                                   | ID/SM (%) | Origin                                  | Accession Number |
|----|--------|-----------|-------------------------------------------|-----------|-----------------------------------------|------------------|
| 1  | orf-4  | 644       | putative serine/threonine protein kinase  | 45/55     | Myxococcus stipitatus DSM 14675         | YP_007358846.1   |
| 2  | orf-3  | 311       | hypothetical protein                      | 51/64     | Myxococcus xanthus DK 1622              | YP_630142.1      |
| 3  | orf-2  | 337       | hypothetical protein                      | 73/81     | Myxococcus sp. (contaminant ex DSM 436) | WP_002637734.1   |
| 4  | orf-1  | 248       | hypothetical protein                      | 63/74     | Corallocooccus coralloides DSM 2259     | YP_005366892.1   |
| 5  | M      | 351       | hydroxyneurosporene-O-methyltransferase   | 52/67     | Synechococcus sp. PCC 6312              | YP_007063273.1   |
| 6  | B      | 1142      | chromopyrrolic acid synthase StaD         | 44/57     | Streptomyces sp. TP-A0274               | BAC15759.1       |
| 7  | C      | 445       | Rieske (2Fe-2S) domain-containing protein | 49/64     | Pusillimonas noertemannii               | WP_017524407.1   |
| 8  | E      | 198       | prodeoxyviolacein synthase VioE           | 46/60     | Pseudoalteromonas sp. 520P1             | BAJ62033.1       |
| 9  | orf+1  | 535       | serine/threonine protein kinase           | 48/63     | Myxococcus xanthus DK 1622              | YP_629143.1      |
| 10 | orf+2  | 204       | hypothetical protein                      | 47/62     | Stigmatella aurantiaca DW4/3-1          | YP_003956677.1   |
| 11 | orf+3  | 246       | putative keratin associated protein       | 30/37     | Cystobacter fuscus                      | WP_002623966.1   |
| 12 | orf+4  | 274       | hypothetical protein                      | 78/86     | Myxococcus sp. (contaminant ex DSM 436) | WP_002640891.1   |
| 13 | orf+5  | 124       | response regulator                        | 83/90     | Myxococcus xanthus DK 1622              | YP_628978.1      |
| 14 | orf+6  | 491       | hypothetical protein                      | 83/91     | Myxococcus fulvus HW-1                  | YP_004664046.1   |
| 15 | orf+7  | 447       | short-chain fatty acid transporter        | 88/93     | Myxococcus stipitatus DSM 14675         | YP_007357717.1   |
| 16 | orf+8  | 168       | hypothetical protein                      | 78/89     | Myxococcus fulvus HW-1                  | YP_004664050.1   |
| 17 | orf+9  | 2082      | polyketide synthase                       | 81/88     | Myxococcus sp. (contaminant ex DSM 436) | WP_002634960.1   |
| 18 | orf+10 | 254       | hypothetical protein                      | 58/67     | Myxococcus xanthus DK 1622              | YP_631014.1      |
| 19 | orf+11 | 1560      | non-ribosomal peptide synthetase          | 79/88     | Myxococcus xanthus DK 1622              | YP_631013.1      |
| 20 | orf+12 | 119       | hypothetical protein                      | 34/47     | Maricaulis maris MCS10                  | YP_755404.1      |
| 21 | orf+13 | 368       | hypothetical protein                      | 47/60     | Stigmatella aurantiaca DW4/3-1          | YP_003954527.1   |
| 22 | orf+14 | 566       | hypothetical protein                      | 68/78     | Myxococcus sp. (contaminant ex DSM 436) | WP_002633419.1   |

**NM343 Amplicon:**

```
TTGATGCTCCAGTACACGTACGCGGCCTGGTCGCTGCCAACTACGTGACGGGTGCGAGTATGTGGAGCGCGGGCTGTGGACGCCCGAGC
AGCTCAAGCTGGTGTGCGGCGACGGCGCCGAGGCGCTGGACCAGGGCTGGCGCGGCACCATCCTGGAGGTGGCCACGAGGAGATGGCCC
ACTTCCTGGTGGCCAACAACCTGCTGATGGCGCTGGGCGAGCCCTTCTACGTCCCCACCGTGGACCTGTCGGGCGCCAACCGCTTCTTCCCC
ATCGACACCGAGTTTCGCGCTCCAGCCCTTCTCGCTGGGCACCCTGGAGCGCTTCATCGAGTTCGAGTACCCGGACTACTTCGAGAAGGAGGT
GGAGACGCCTCCGGAGCTGGCCGCCGTCGCCGAGGTGGCCGGCCTGCCGGTGTGGCCACCATCCCGGACCTGGGCCTGGACAATGGCCCG
GGGTACAGCTCGGTGAGCGAGCTGTACCAGCAGATTCGCGAGGCCTTCGAGACGCTGCCGGACCTCATCTGGTGGAGCGGGCAAGCAG
GGCGGCGAGCACCACTGTTCTGCACGAGGCCATCAACCGCAAGCACCCGGACTACCAGCTCCAG
```

**Figure S1.** Annotation of the *mar* gene cluster found in clone NM343 (GenBank accession: KF551863). Annotations are based on a BLASTP homology search of translated genes predicted by FGENESB.

**Methylarcyriarubin (1):** UV (methanol)  $\lambda_{\text{max}}$  227, 276, 377, 475;  $^1\text{H}$  NMR (600 MHz,  $\text{DMSO-}d_6$ )  $\delta$ 3.05 (3H, s, H<sub>3</sub>-13), 6.63 (2H, t,  $J$  = 7.5 Hz, H-10), 6.80 (2H, d,  $J$  = 8.0 Hz, H-11), 6.97 (2H, t,  $J$  = 7.5 Hz, H-9), 7.37 (2H, d,  $J$  = 8.1 Hz, H-8), 7.75 (2H, s, H-5), 11.66 (2H, bs, N-4);  $^{13}\text{C}$  NMR (150 MHz,  $\text{DMSO-}d_6$ )  $\delta$ 24.0 (C-13), 105.6 (C-6), 111.7 (C-8), 119.3 (C-10), 120.9 (C-11), 121.6 (C-9), 125.3 (C-12), 127.1 (C-3), 129.1 (C-5), 136.0 (C-7), 171.8 (C-2); HR-ESI-MS  $m/z$  342.1237 [ $\text{M-H}$ ]<sup>+</sup> (calcd for  $\text{C}_{21}\text{H}_{16}\text{N}_3\text{O}_2$ , 342.1243).

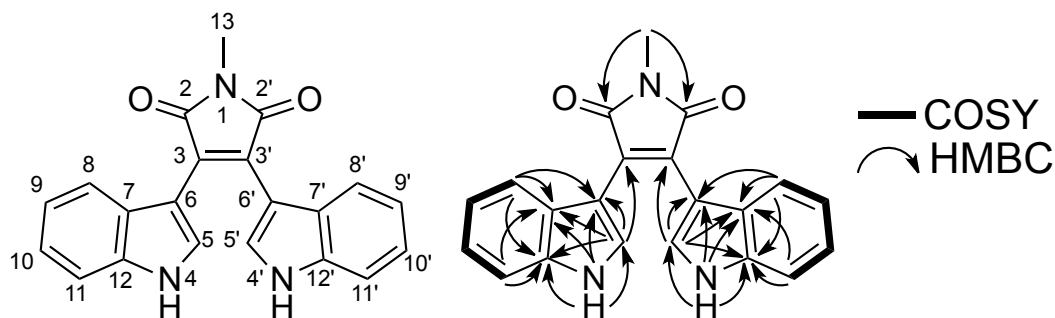

**Figure S2.** Spectroscopic data for methylarcyriarubin (**1**). This data is consistent with that reported from the synthesis of compound **1**.<sup>[30]</sup> **Top:** UV,  $^1\text{H}$  NMR,  $^{13}\text{C}$  NMR, and HR-ESI-MS data summary of **1**. **Bottom:** Correlations observed in HMBC and  $^1\text{H}$ - $^1\text{H}$  COSY NMR spectra of **1**.

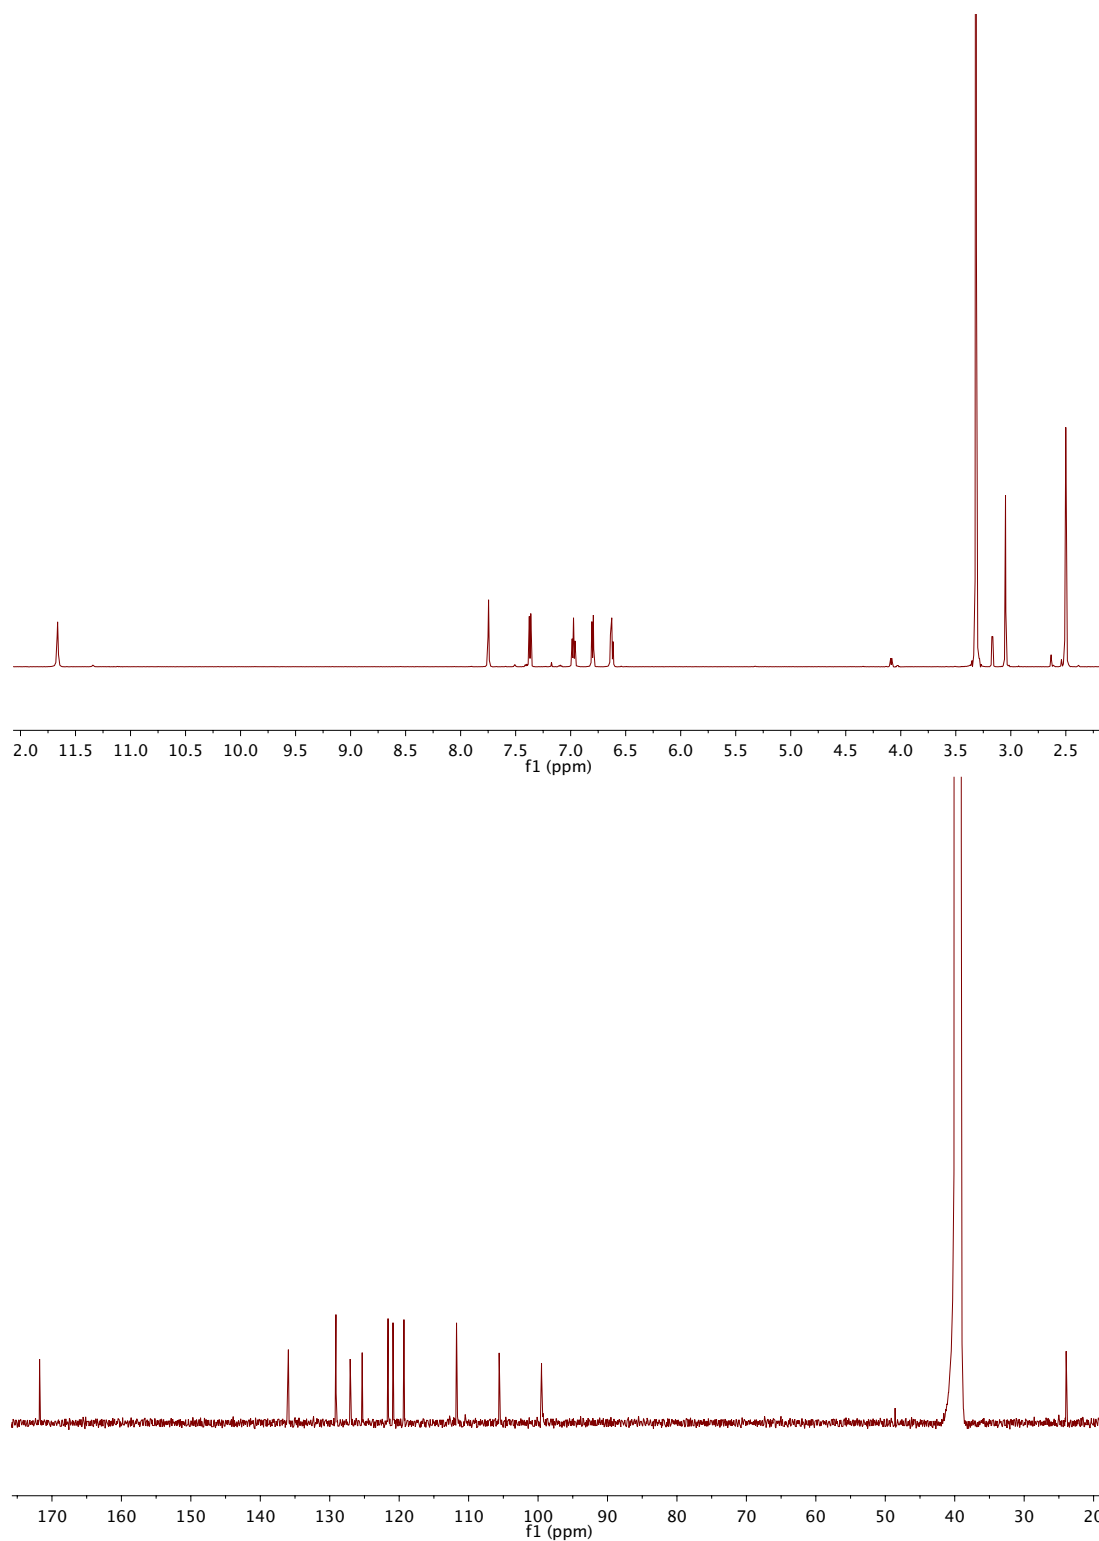

**Figure S3.** <sup>1</sup>H NMR (top, 600 MHz) and <sup>13</sup>C NMR (bottom, 150 MHz) of methylarcyriarubin (1) in DMSO-*d*<sub>6</sub>.

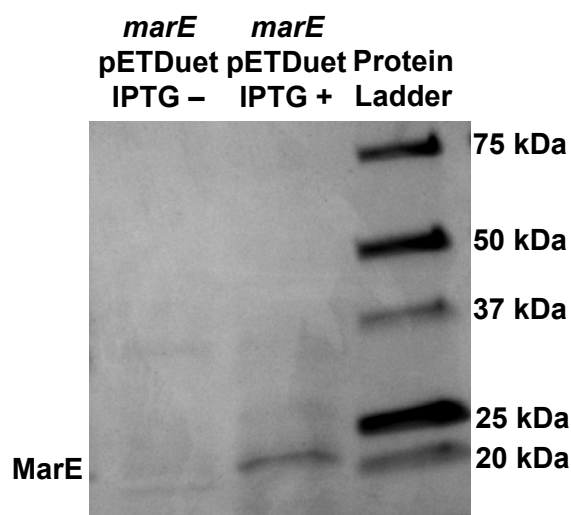

**Figure S4.** Soluble protein extract of *marE*/pETDuet harboring *E. coli* with or without IPTG induction (200 rpm, 37 °C, 2 hours after OD<sub>600</sub> ~0.5). IPTG-dependent expression of a protein with the size corresponding to MarE (~22 kDa) is observed.
